# Supplementary material for: Current environmental status of the oyster farms on Lake Kamo in Japan; viral control of the harmful bloom of Heterocapsa circularisquama
Source: PeerJ. 2023 May 11;11:e14813. doi: 10.7717/peerj.14813 (PMC10183167; doi:10.7717/peerj.14813)
Supplement: Supplemental Information 1 — The density of H. circularisquama and HcRNAV from July to October in 2010–2020. [file peerj-11-14813-s001.xlsx]

## Sheet: HC
Hc_SW_2010-2020 St.2_Haraguro (cells/ml)
		Depth [ｍ]
year	date	0m	3m	6m	7.3m	Max
2010	2010-07-07	0.1	0.01	0.01	0.1	0.1
	2010-07-27	0.1	0.01	0.01	5	5
	2010-08-03	0.1	0.01	0.01	3	3
	2010-08-09	18	0.01	0.01	220	220
	2010-08-12	50	0.01	0.01	2000	2000
	2010-08-14	1300	0.01	0.01	580	1300
	2010-08-16	720	0.01	0.01	360	720
	2010-08-25	38	0.01	0.01	48	48
	2010-09-01	103	0.01	0.01	15	103
	2010-09-08	0.1	0.01	0.01	0.1	0.1
	2010-09-15	0.1	0.01	0.01	0.1	0.1
	2010-09-22	2	0.01	0.01	0.1	2
	2010-09-29	3	0.01	0.01	0.1	3
	2010-10-06	0.1	0.01	0.01	0.1	0.1
	2010-10-13	0.1	0.01	0.01	0.1	0.1
	2010-10-20	2	0.01	0.01	2	2
	2010-10-27	22	0.01	0.01	11	22
2011	2011-06-16	0.1	0.01	0.01	0.1	0.1
	2011-07-14	0.1	0.01	0.01	0.1	0.1
	2011-07-21	0.1	0.01	0.01	190	190
	2011-07-28	0.1	0.01	0.01	5	5
	2011-08-04	0.1	0.01	0.01	0.1	0.1
	2011-08-11	0.1	0.01	0.01	18	18
	2011-08-18	2	0.01	0.01	19	19
	2011-08-25	310	0.01	0.01	220	310
	2011-08-28	9000	0.01	0.01	0.01	9000
	2011-09-01	0.1	0.01	0.01	0.1	0.1
	2011-09-08	3	0.01	0.01	0.1	3
	2011-09-15	7	0.01	0.01	16	7
	2011-09-22	15	0.01	0.01	2	15
	2011-09-29	0.1	0.01	0.01	0.1	0.1
	2011-10-06	0.1	0.01	0.01	0.1	0.1
2012	2012-06-13	0.1	0.1	0.1	0.1	0.1
	2012-07-11	0.1	0.1	0.1	0.1	0.1
	2012-07-18	0.1	0.1	0.1	0.1	0.1
	2012-07-25	0.1	0.1	8	14	14
	2012-08-01	0.1	0.1	1600	240	1600
	2012-08-08	10	15	15	14	15
	2012-08-17	1	0.1	2	2	2
	2012-08-22	1	3	30	3	30
	2012-08-29	1	3	660	60	660
	2012-09-05	64	94	100	16	100
	2012-09-12	7	3	0.1	0.1	7
	2012-09-19	28	12	24	5	28
	2012-09-26	28	61	2	2	28
	2012-10-03	4	25	15	2	25
	2012-10-10	3	2	0.1	0.1	3
	2012-10-17	0.1	0.1	0.1	0.1	0.1
	2012-10-24	0.1	0.1	0.1	0.1	0.1
	2012-10-31	0.1	0.1	0.1	0.1	0.1
	2012-11-14	2	5	1	2	5
	2012-12-12	0	6	5	0.1	6
2013	2013-06-18	0.1	0.1	0.1	2	2
	2013-07-10	0.1	0.1	0.1	0.1	0.1
	2013-07-23	0.1	0.1	0.1	3	3
	2013-08-06	0.1	2	7	2	7
	2013-08-20	119	61	78	13	119
	2013-09-03	15	22	44	2	44
	2013-09-18	0.1	0.1	0.1	0.1	0.1
	2013-10-18	0.1	0.1	0.1	0.1	0.1
	2013-11-15	0.1	0.1	0.1	0.1	0.1
2014	2014-07-10	5	2	4	0.1	5
	2014-07-22	0.1	0.1	2	0.1	0.1
	2014-08-05	11.3	23.7	957	268	957
	2014-08-12	4	2	2	6	6
	2014-08-19	0.1	0.1	0.1	0.1	0.1
	2014-09-04	0.1	2	7	0.1	7
	2014-09-18	0.1	0.1	0.1	0.1	0.1
	2014-10-02	0.1	0.1	5	0.1	5
	2014-10-20	0.1	0.1	0.1	0.1	0.1
2015	2015-07-08	0.1	0.1	0.1	0.1	0.1
	2015-07-21	0.1	0.1	0.1	0.1	0.1
	2015-08-04	0.1	0.1	0.1	0.1	0.1
	2015-08-18	2	0.1	0.1	0.1	0.1
	2015-09-04	25	59	0.1	2	59
	2015-09-15	0.1	5	0.1	0.1	5
	2015-10-06	0.1	0.1	0.1	0.1	0.1
	2015-10-20	0.1	0.1	0.1	0.1	0.1
2016	2016-07-12	0.1	0.1	0.1	0.1	0.1
	2016-07-25	0.1	2	2	0.1	2
	2016-08-02	0.1	0.1	0.1	0.1	0.1
	2016-08-09	0.1	2	13	10	13
	2016-08-17	0.1	2	0.1	0.1	2
	2016-08-23	0.1	2	9	0.1	9
	2016-08-30	0.1	2	0.1	0.1	2
	2016-09-07	0.1	0.1	0.1	2	2
	2016-09-13	0.1	0.1	0.1	0.1	0.1
	2016-09-20	0.1	0.1	0.1	0.1	0.1
	2016-10-04	5	21	4	0.1	21
	2016-10-07	161	80	6	5	4128
	2016-10-12	3	0.1	2	2	3
	2016-10-18	3	0.1	2	0.1	3
	2016-10-26	3	2	2	0.1	3
2017	2017-06-28	0.1	-	6	0	0.1
	2017-07-11	0.5	0	1	2.5	2.5
	2017-07-25	0.1	0.1	0.1	0.1	0.1
	2017-08-01	0	2	0.1	0.1	2
	2017-08-10	1	0.1	0.1	0.1	0.1
	2017-08-22	0.1	1	3.3	1	3.3
	2017-09-05	0.1	0.1	3	1	3
	2017-09-08	112	208	65	10.5	208
	2017-09-13	16.5	36.5	2	3	36.5
	2017-09-26	1.5	0.1	0.1	0.1	1.5
	2017-10-10	0.5	1	0.5	0.1	1
	2017-10-24	2	0.1	0.1	0.1	2
2018	2018-07-10	0.1	0.1	0.1	0.5	0.5
	2018-07-24	0.1	0.5	0.1	0.1	0.5
	2018-08-07	0.5	0.5	0.1	0.1	0.5
	2018-08-21	2	2	1	3	3
	2018-09-04	0.1	0.5	0.5	0.1	0.5
	2018-09-18	0.1	0.1	0.1	0.1	0.1
	2018-10-02	6.5	1	7.5	5.5	7.5
	2018-10-16	4	5	2.5	0.1	5
	2018-10-23	3.5	39	141	43	141
	2018-10-29	264.5	225.5	125.667	108	264.5
	2018-11-06	18.5	153	173.5	193	173.5
	2018-11-13	0.1	0.5	2	1	2
2019	2019-06-07	0.1	0.1	0.1	0.1	0.1
	2019-07-02	0.5	1	0.1	0.1	0.5
	2019-07-16	0.1	0.1	2	4.5	2
	2019-07-30	0.1	0.5	760.5	70	760.5
	2019-08-06	1.5	2	977	30.5	977
	2019-08-16	1	1	23	5	23
	2019-08-27	0.1	0.1	1	0.1	0.1
	2019-09-10	0.1	0.1	0.1	0.1	0.1
	2019-09-18	0.1	112.667	15.5	0.5	112.7
	2019-09-25	0.5	0.5	0.1	0.1	0.1
	2019-10-08	0.5	0.1	1	0.1	0.1
	2019-10-23	0.1	0.1	0.1	0.1	0.1
2020	2020-07-01	0.1	0.1	0.1	0.1	0.1
	2020-07-14	0.5	0.1	0.1	0.1	0.5
	2020-07-28	0.1	0.1	0.1	0.1	0.1
	2020-08-12	1.5	0.5	0.1	0.1	1.5
	2020-08-25	0.1	0.1	1.5	4.5	4.5
	2020-09-08	0.1	0.1	0.1	2	2
	2020-09-15	126	219.5	115.5	99.5	219.5
	2020-09-24	0.1	0.1	0.1	0.1	0.1
	2020-10-06	429	348.5	12.5	2.5	429
	2020-10-13	53.5	12	12	6	53.5
	2020-10-20	52.5	14.5	4.5	3.5	52.5
	2020-10-27	0.5	1	0.5	0.5	1
	2020-11-05	2	1	0.5	0.1	2

## Sheet: MAX_HCRNAV
HcRANV_SWMax St2_Haraguro_(titer or copies/ml)
		depth
year	date	Max
2010	2010-06-15		MPN (titler/mL)
	2010-07-07	0.01
	2010-07-27	0.01
	2010-08-03	746.2
	2010-08-09	4925
	2010-08-12	0.01
	2010-08-14	0.01
	2010-08-16	467.01
	2010-08-25	53.91
	2010-09-01	301.2
	2010-09-08	13.83
	2010-09-15	51.57
	2010-09-22	125.155
	2010-09-29	193.55
	2010-10-06	0.01
	2010-10-13	0.01
	2010-10-20	448.95
	2010-10-27	0.01
2011	2011-06-16	0.01
	2011-07-14	0.01
	2011-07-21	0.01
	2011-07-28	24.58
	2011-08-04	15.35
	2011-08-11	6.03
	2011-08-18	61
	2011-08-25	14002.1
	2011-09-01	24304
	2011-09-08	77.42
	2011-09-15	39.31
	2011-09-22	25.91
	2011-09-29	0.03
2012	2011-10-06	6.03
	2012-06-13	16.52
	2012-07-18	27.83
	2012-07-25	153.01
	2012-08-01	710.33
	2012-08-08	216.71
	2012-08-17	53.3
	2012-08-22	26.02
	2012-08-29	24304
	2012-09-05	131.12
	2012-09-12	2614.8
	2012-10-03	100.27
	2012-10-24	55500.2
	2012-10-31	0.01
2013	2013-06-18	76.5
	2013-07-10	0.01
	2013-07-23	51.01
	2013-08-06	0.01
	2013-08-20	0.01
	2013-09-03	77.7
	2013-09-18	18.92
	2013-10-18	6.03
2014	2014-07-10	102.41
	2014-07-22	125.02
	2014-08-05	28.86
	2014-08-12	102.41
	2014-08-19	34.26
	2014-09-04	231.7
	2014-09-18	100.12
	2014-10-02	0.01
	2014-10-20	0.01
2015	2015-07-08	0.01
	2015-07-21	0.01
	2015-08-04	61.92
	2015-08-18	29.42
	2015-09-04	281.42
	2015-09-15	66.12
	2015-10-06	13.91
	2015-10-20	0.03
2016	2016-07-12	0.01
	2016-07-25	0.01
	2016-08-02	0.01
	2016-08-09	400.6
	2016-08-17	0.01
	2016-08-23	46.41
	2016-08-30	29.42
	2016-09-07	0.01
	2016-09-13	281.42
	2016-09-20	66.12
	2016-10-04	18.62
	2016-10-07	0.01
	2016-10-12	5.62
	2016-10-18	0.01
	2016-10-26	0.01
2017	2017-06-28	0.01
	2017-07-11	0.01
	2017-07-25	76.2
	2017-08-01	0.01
	2017-08-10	0.01
	2017-08-22	0.01
	2017-09-05	0.01
	2017-09-08	0.01
	2017-09-13	0.01
	2017-09-26	76.2
	2017-10-10	0.01
	2017-10-24	0.01
2018	2018-07-10	0.01	RT-qPCR (copies/ml)
	2018-07-24	0.01
	2018-08-07	0.01
	2018-08-21	0.01
	2018-09-04	0.01
	2018-09-18	0.01
	2018-10-02	0.01
	2018-10-16	0.01
	2018-10-23	17460
	2018-10-29	15298
	2018-11-06	392
2019	2019-06-07	77
	2019-07-02	65.8956
	2019-07-16	6873
	2019-07-30	1254
	2019-08-06	1433
	2019-08-16	2100
	2019-08-27	383
	2019-09-10	167
	2019-09-18	660
	2019-09-25	12795.4
	2019-10-08	623.703
	2019-10-23	81.0939
2020	2020-07-01	293.315
	2020-07-14	359.442
	2020-07-28	279.445
	2020-08-12	192.887
	2020-08-25	135.684
	2020-09-08	8.93706e+06
	2020-09-15	1.1896e+06
	2020-09-24	112922
	2020-10-06	43580
	2020-10-13	3194.22
	2020-10-20	9401.62
	2020-10-27	10983
	2020-11-05	4641.64
2021	2021-06-29
	2021-07-14	417.194
	2021-07-27	136.34
	2021-08-11	2443.7
	2021-08-24	2862.8
	2021-09-07	411851
	2021-09-22	2765.74
	2021-10-05	58522.9
	2021-10-19

## Sheet: sediment
HcRANV_SD_ St2_Haraguro_(titer or copies/g)
year	date	Hu	HCLG1	05HC06	Total
2010	2010-06-15	0.1	0.1	0.1	0.01	MPN (titler/mL)
	2010-07-07	0.1	0.1	0.1	0.01
	2010-07-27	0.1	0.1	85.1	85.3
	2010-08-03	2223	114.894	162.63	2500.52
	2010-08-09	606.9	1225.7	921.06	2753.66
	2010-08-12	0.1	0.1	0.1	0.1
	2010-08-14	0.1	0.1	0.1	0.1
	2010-08-16	226.1	480.76	0.1	706.96
	2010-08-25	4.697	0.1	0.1	4.897
	2010-09-01	30.031	30.031	30.031	90.093
	2010-09-08	36.12	8.424	25.32	69.864
	2010-09-15	162.84	355.18	35.518	553.538
	2010-09-22	0.1	0.1	17.64	17.84
	2010-09-29	183.48	39.732	352.44	575.652
	2010-10-06				0.01
	2010-10-13				0.01
	2010-10-20	23.56	1	43.4	67.96
	2010-10-27				0.01
2011	2011-06-16	0.1	0.1	0.1	0.01
	2011-07-14	0.1	0.1	0.1	0.01
	2011-07-21	0.1	0.1	0.1	0.01
	2011-07-28	0.1	0.1	0.1	0.01
	2011-08-04	3.01	5.1	3.01	11.12
	2011-08-11	0.1	3.01	0.1	3.21
	2011-08-18	3	5.1	3	11.1
	2011-08-25	255	0.1	30.1	285.2
	2011-09-01	190	702	22.6	914.6
	2011-09-08	19	510	0.1	529.1
	2011-09-15	0.1	0.1	0.1	0.01
	2011-09-22	0.1	0.1	0.1	0.01
	2011-09-29	0.1	0.1	0.1	0.01
	2011-10-06	3.85	0.1	0.1	4.05
2012	2012-06-13	3.85	3.01	3.01	9.87
	2012-07-11	0.1	0.1	0.1	0.3
	2012-07-18	13.9	1	7.02	21.92
	2012-07-25	0.1	0.1	20.8	21
	2012-08-01	3.85	13.8	13.8	31.45
	2012-08-08	5.82	25.5	44.5	75.82
	2012-08-17	13.9	25.5	38.5	77.9
	2012-08-22	3.85	3.85	7.02	14.72
	2012-08-29	190	702	22.6	914.6
	2012-09-05	13.8	98.2	10.3	122.3
	2012-09-12	5.1	13.9	0.1	19.1
	2012-10-03	25.5	3.01	30.1	58.61
	2012-10-24	25500	25500	0.1	51000.1
2013	2013-05-24	0.1	0.1	0.1	0.01
	2013-06-18	2.08	0.1	0.1	2.28
	2013-07-10	0.1	0.1	0.1	0.01
	2013-07-23	0.1	25.5	35	60.6
	2013-08-06	0.1	0	25.5	25.6
	2013-08-20	0.1	0.1	0.1	0.01
	2013-09-03	0.1	0.1	0.1	0.01
	2013-09-18	0.1	13.9	9.4	23.4
	2013-10-18	25.5	25.5	38.5	89.5
	2013-11-15	3.01	3.01	10.3	16.32
2014	2014-07-10	0.1	25	0.1	25.2
	2014-07-22	0.1	0.1	0.1	0.01
	2014-08-05	0.1	0.1	19	19.2
	2014-08-12	0.1	25	0.1	25.2
	2014-08-19	0.1	0.1	0.1	0.3
	2014-09-04	0.1	0.1	9.82	10.02
	2014-09-18	0.1	0.1	0.1	0.01
	2014-10-02	0.1	0.1	98.2	98.4
	2014-10-20	0.1	0.1	0.1	0.01
2015	2015-07-08	0.1	0.1	0.1	0.01
	2015-07-21	0.1	0.1	0.1	0.01
	2015-08-04	0.1	0.1	0.1	0.01
	2015-08-18	0.1	0.1	0.1	0.01
	2015-09-04	240	23.1	23.1	286.2
	2015-09-15	23.1	23.1	12.1	58.3
	2015-10-06	11.3	4.1	0.1	15.5
	2015-10-20	0.1	0.1	0.1	0.01
2016	2016-07-12	0.1	0.1	0.1	0.01
	2016-07-25	0.1	0.1	0.1	0.01
	2016-08-02	0.1	0.1	0.1	0.01
	2016-08-09	0.1	18.6	46.7	65.4
	2016-08-17	0.1	0.1	0.1	0.01
	2016-08-23	0.1	0.1	0.1	0.01
	2016-08-30	0.1	0.1	0.1	0.01
	2016-09-07	0.1	0.1	0.1	0.01
	2016-09-13	240	23.1	23.1	286.2
	2016-09-20	23.1	23.1	12.1	58.3
	2016-10-04	4.1	0.1	23.1	27.3
	2016-10-07	0.1	0.1	0.1	0.01
	2016-10-12	0.1	0.1	18.6	18.8
	2016-10-18	4.1	0.1	23.1	27.3
	2016-10-26	0.1	11.3	11.3	22.7
2017	2017-06-28				0.01
	2017-07-11	0.1	0.1	0.1	0.01
	2017-07-25	25.4	25.4	25.4	76.2
	2017-08-01	0.1	0.1	0.1	0.01
	2017-08-10	0.1	0.1	0.1	0.01
	2017-08-22	0.1	0.1	0.1	0.01
	2017-09-05	0.1	0.1	0.1	0.01
	2017-09-08	0.1	0.1	0.1	0.01
	2017-09-13	0.1	0.1	0.1	0.01
	2017-09-26	25.4	25.4	25.4	76.2
	2017-10-10	0.1	0.1	0.1	0.01
	2017-10-24	0.1	0.1	0.1	0.01
2018	2018-07-10				369600	RT-qPCR (copies/ml)
	2018-07-24				988350
	2018-08-07				746400
	2018-08-21				3146100
	2018-09-04				1066850
	2018-09-18				415250
	2018-10-02				161800
	2018-10-16				120150
	2018-10-23				0.01
	2018-10-29				0.01
	2018-11-06				301650
2019	2019-06-07				0.01
	2019-07-02				432877
	2019-07-16				236322
	2019-07-30				141285
	2019-08-06				8088.11
	2019-08-16				162286
	2019-08-27				114891
	2019-09-10				3.65521e+06
	2019-09-18				39557.2
	2019-09-25				3.71071e+06
	2019-10-08				200601
	2019-10-23				512164
2020	7.14				569575
	7.28				305490
	8.12				185902
	8.25				52878.9
	9.8				29531
	9.15				72734.9
	9.24				3.95981e+06
	10.6				466.941
	10.13				4.68722e+06
	10.20				205853
	10.27				111285
	11.5				1.31276e+06
2021	7.14				1.74861e+07
	7.27				2.63074e+07
	8.11				339049
	8.24				3.95556e+06
	9.7				1.26329e+07
	9.22				2.95727e+06
	10.5				3.27014e+06
	10.19				4.59595e+06
