# Supplementary material for: Current environmental status of the oyster farms on Lake Kamo in Japan; viral control of the harmful bloom of Heterocapsa circularisquama
Source: PeerJ. 2023 May 11;11:e14813. doi: 10.7717/peerj.14813 (PMC10183167; doi:10.7717/peerj.14813)
Supplement: Supplemental Information 2 — The temporal changes recorded from July to October in 2010–2020 for water temperature, salinity, and dissolved oxygen [file peerj-11-14813-s002.xlsx]

## Sheet: 水質_解析用
WaterTemp, Salinity, Salinity 2010-
		2009							2010								2011								2012								2013								2014								2015
DO		2009-07-09	2009-07-21	2009-08-10	2009-08-26	2009-09-10	2009-10-05	2009-10-26	2010-07-07	2020-07-27	2010-08-09	2010-08-25	2010-09-08	2010-09-22	2010-10-13	2010-10-27	2011-07-13	2011-07-27	2011-08-10	2011-08-24	2011-09-07	2011-09-21	2011-10-05	2011-10-19	2012-07-11	2012-07-25	2012-08-08	2012-08-22	2012-09-12	2012-09-26	2012-10-10	2012-10-24	2013-07-10	2013-07-23	2013-08-06	2013-08-20	2013-09-03	2013-09-18	2013-10-01	2013-10-15	2014-07-10	2014-07-22	2014-08-05	2014-08-19	2014-09-04	2014-09-18	2014-10-02	2014-10-20	2015-07-08
No.2	0m								7.25	7.19	7.12	8.12	5.77	6.65	7.53	5.95	7.82	6.55	6.82	9.17	8.13	6.49	8.23	7.53	7.3	7.02	7.52	7.47	7.44	6.26	6.88	7.76	7.47	7.28	8.12	6.53	7.17	7.13	7.71	8.65	6.66	7.6	7.25	8.11	6.54	6.7	7.93	8.72	7.76
Hraguro	3m								8.17	7.16	8.27	8.14	5.55	5.87	6.67	6.26	7.64	6.78	6.88	6.56	6.58	5.94	5.27	7.12	8.39	8.03	8.88	7.58	6.85	5.78	7.07	7.49	6.32	6.2	5.93	6.28	6.5	5.2	7.3	7.78	7.57	5.27	10.97	4.99	6.67	6.5	6.78	5.19	7.59
	6m								7.1	5.06	7.43	2.98	2.96	1.91	5.75	6.52	2.93	4.55	5.02	1.8	3.01	5.44	4.72	5.44	4.25	1.65	2.94	4.27	3.21	6.03	6.86	7.19	1.31	0.97	1.78	5.14	1.35	1.05	1.82	3.47	2.42	2.42	3.17	1.77	2.33	5.96	2.07	2.2	2.78
	B-1m								5.81	3.17	2.93	0.97	1.01	0.96	2.21	6.48	1.36	1.53	3.71	1.58	2.16	5.32	4.73	4.92	1.68	0.17	0.14	0.87	0.14	4.74	6.64	6.98	0.11	0.09	0.14	0.14	0.09	0.11	0.1	4.35	0.22	0.13	0.2	0.12	0.18	0.56	1.04	1.77	0.8
WT																									2012-07-11	2012-07-25	2012-08-08	2012-08-22	2012-09-12	2012-09-26	2012-10-10	2012-10-24	2013-07-10	2013-07-23	2013-08-06	2013-08-20	2013-09-03	2013-09-18	2013-10-01	2013-10-15	2014-07-10	2014-07-22	2014-08-05	2014-08-19	2014-09-04	2014-09-18	2014-10-02	2014-10-20	2015-07-08
No.2	0m	24.5	23.4	25.6	26.3	25.5	22.1	17.7	27.2	28.3	29.9	30.2	29.4	26.1	22.3	18.8	28.9	28.3	30.6	24.2	25.2	22.6	18	19.3	26.3	26.6	28.2	30.3	26.3	26.3	23.2	18.1	25.9	25.8	27.5	28.8	26	22.4	24.8	21.9	24.5	27.6	25.6	26.8	27	24.2	21.6	16.4	24.3
Hraguro	3m	24.2	24.1	26.2	27.6	25.4	23.1	20.3	25	28.2	29.5	30.1	29.4	27.6	24.9	18.3	24.9	28.2	29.7	26.7	26.8	23	23.2	19.9	24.3	25.5	28.8	29.9	29.4	26.5	23.2	19.1	24.9	24.5	25.5	28.4	28	27.1	24.7	22.1	25.5	25.9	25.9	25.8	27.4	24.4	23.9	21.4	23.2
	6m	23.1	23.1	24.3	26.1	26	23.4	20.1	23.5	25.8	28.2	29.1	29.4	28	24.8	18.4	22.5	26	27.4	26.5	26.4	23.3	22.6	20.8	22.6	23.6	26.1	28.4	29.2	26.2	23.2	19.1	23.6	23.3	23.7	26.5	27.3	27	25.3	23.3	23.1	24.4	25.2	25	26.4	24.6	24	21.8	22.1
	B-1m	22.4	22.3	22.1	23.2	24.6	23.2	20	22.9	25.2	26.7	28.2	28.8	26.9	25	18.4	21.4	22.8	26.6	25.9	25.5	23.5	22.5	20.8	22.1	22.3	25	27.3	28.4	26.3	23	19.8	21.9	21.8	22.7	23.9	26.5	26.8	25.3	23.1	22.1	22.8	25.2	24.1	25	25	23.9	21.8	21.8
	AV																								23.825	24.5	27.025	28.975	28.325	26.325	23.15	19.025	24.075	23.85	24.85	26.9	26.95	25.825	25.025	22.6	23.8	25.175	25.475	25.425	26.45	24.55	23.35	20.35	22.85
Salinity																									2012-07-11	2012-07-25	2012-08-08	2012-08-22	2012-09-12	2012-09-26	2012-10-10	2012-10-24	130710	130723	130806	130820	130903	130918	131001	131015	2014-07-10	2014-07-22	2014-08-05	2014-08-19	2014-09-04	2014-09-18	2014-10-02	2014-10-20	2015-07-08
No.2	0m																								2.56	2.15	1.46	2.88	2.51	1.7	2.74	2.83	2.56	2.15	1.46	2.88	2.51	1.7	2.74	2.83	13.1	1.87	2.71	2.34	2.78	3.04	2.76	2.12	29.3
Haraguro	3m																								2.79	2.89	2.92	2.92	2.83	2.85	2.8	2.85	2.79	2.89	2.92	2.92	2.83	2.85	2.8	2.85	28.8	2.97	2.99	2.98	3.03	3.04	3	2.83	30.8
	6m																								2.99	3.04	2.96	3.04	2.99	2.97	2.93	2.92	2.99	3.04	2.96	3.04	2.99	2.97	2.93	2.92	30.6	3.05	3.06	3.06	3.06	3.04	3.05	2.87	31.1
	B-1m																								3.09	3.06	3.01	3.04	3.01	3	2.95	2.96	3.09	3.06	3.01	3.04	3.01	3	2.95	2.96	30.3	3.06	3.06	3.06	3.05	3.1	3.05	2.91	31.2
Salinity																									2012-07-11	2012-07-25	2012-08-08	2012-08-22	2012-09-12	2012-09-26	2012-10-10	2012-10-24	2013-07-10	2013-07-23	2013-08-06	2013-08-20	2013-09-03	2013-09-18	2013-10-01	2013-10-15	2014-07-10	2014-07-22	2014-08-05	2014-08-19	2014-09-04	2014-09-18	2014-10-02	2014-10-20	2015-07-08
No.2	0m								23.4	29.4	30.1	30.3	30.5	23.8	24.5	29.4	22.5	27.6	25.4	16.3	28.5	27.6	22.9	27.8	19.8	22.3	28.8	29.4	16.5	29.5	29.6	28.8	25.6	21.5	14.6	28.8	25.1	17	27.4	28.3	13.1	18.7	27.1	23.4	27.8	30.4	27.6	21.2	29.3
Hraguro	3m								29.4	29.4	30.4	30.3	30.8	28.9	29.4	29.4	28.8	29	29.8	29.8	30.2	29	28.6	28.9	28.1	29.2	30.1	29.8	29.3	29.8	29.7	29.3	27.9	28.9	29.2	29.2	28.3	28.5	28	28.5	28.8	29.7	29.9	29.8	30.3	30.4	30	28.3	30.8
	6m								30.4	30.4	30.6	30.8	31.1	30.6	29.7	29.4	29.8	30	30.1	30.4	30.4	29.4	29.2	29.7	30.7	30.4	30.5	30.5	30.4	29.7	29.6	29.4	29.9	30.4	29.6	30.4	29.9	29.7	29.3	29.2	30.6	30.5	30.6	30.6	30.6	30.4	30.5	28.7	31.1
	B-1m								30.3	30.6	30.8	30.9	31.2	30.7	30.4	29.3	30	30.4	30.1	30.5	27.4	29.6	28.6	29.9	30.8	30.7	30.6	30.6	30.6	29.8	29.6	29.7	30.9	30.6	30.1	30.4	30.1	30	29.5	29.6	30.3	30.6	30.6	30.6	30.5	31	30.5	29.1	31.2
																				DO			2010	2011	2012	2013	2014	2015	2016	2017	2018	2019	2020	2021
																					0m		6.9475	7.5925	7.20625	7.5075	7.43875	8.2	7.18375	6.9825	6.74	6.89	6.79	7.19125
																					3m		7.01125	6.59625	7.50875	6.43875	6.7425	8.14125	6.86875	6.28	6.60429	7.32125	6.73	6.8225
																					6m		4.96375	4.11375	4.55	2.11125	2.7925	5.63875	3.89125	3.075	2.77714	4.48	2.90875	3.7575
																					7.3m		2.9425	3.16375	2.67	0.64125	0.5275	3.99375	2.24375	2.15375	1.84857	1.46125	1.04875	1.82375
				8月の平均値
							2010	2011	2012	2013	2014	2015	2016	2017	2018	2019	2020	2021
					0m		30.05	27.4	29.25	28.15	26.2	28.75	29.8	28.0358	28.3	28.6	28.55	27.85
					3m		29.8	28.2	29.35	26.95	25.85	28.05	29.25	29.0821	28	29.75	27.55	28.2
					6m		28.65	26.95	27.25	25.1	25.1	27.4	27.8	26.0478	27.5	28.55	25.1	26.45
					7.3m		27.45	26.25	26.15	23.3	24.65	26	26.1	25.1584	26.85	27.45	22.95	25.45
																				原黒
				9と10月の平均値																平均値（全て）
							2010	2011	2012	2013	2014	2015	2016	2017	2018	2019	2020	2021		水温		2009	2010	2011	2012	2013	2014	2015	2016	2017	2018	2019	2020	2021
					0m		24.15	21.275	23.475	23.775	22.3	22.175	24	21.3656	22.925	23.425	24.35	23.425			0m	23.5857	26.525	24.6375	25.6625	25.3875	24.2125	24.6125	25.825	24.2667	25.6125	25.6625	25.325	25.6875
					3m		25.05	23.225	24.55	25.475	24.275	22.25	24.175	22.1242	23.35	24.275	24.875	23.95			3m	24.4143	26.625	25.3	25.8375	25.65	25.025	24.25	25.6	24.5951	25.0625	26.2625	25.4875	25.75
					6m		25.15	23.275	24.425	25.725	24.2	22.15	24.15	22.1765	24.125	24.175	24.8	23.925			6m	23.7286	25.9	24.4375	24.8	25	24.3125	23.6375	24.9375	23.5127	24.7	25.325	24.4875	24.6375
					7.3m		24.775	23.075	24.375	25.425	23.925	22.3	24.125	22.0457	24.175	24	23.925	23.95			7.3m	22.5429	25.2625	23.625	24.275	24	23.7375	23.2875	24.3125	22.9375	24.3875	24.6625	23.3	23.9
																					全層平均値	23.5679	26.0781	24.5	25.1438	25.0094	24.3219	23.9469	25.1687	23.828	24.9406	25.4781	24.65	24.9938
				9月の平均値																最高と最低の平均値
							2010	2011	2012	2013	2014	2015	2016	2017	2018	2019	2020	2021					2010	2011	2012	2013	2014	2015	2016	2017	2018	2019	2020	2021
					0m		27.75	23.9	26.3	24.2	25.6	24.6	25.75	24.426	25.55	26.7	27.8	24.75			0m			24.3	24.2	25.35	22	23.9	25.3	21.8808	24.1	24.05	24.85	24.8
					3m		28.5	24.9	27.95	27.55	25.9	24.8	26	25.0015	26.3	26.65	28.3	25.9			3m			24.8	24.5	25.25	24.4	23.45	25	23.1181	23.75	26.05	24.8	24.55
					6m		28.7	24.85	27.7	27.15	25.5	24.85	25.95	24.8969	26.05	26.1	27.4	25.6			6m			24.1	24.15	25.3	24.1	23.35	24.75	22.0195	24.05	25.3	24.25	23.5
					7.3m		27.85	24.5	27.35	26.65	25	24.7	25.85	24.583	25.95	25.6	25.45	25.15			7.3m			23.7	24.1	24.95	23.4	22.95	24.15	21.6533	24.1	24.75	23.15	23.35
				10月の平均値																a	７−１０月の平均
							2010	2011	2012	2013	2014	2015	2016	2017	2018	2019	2020	2021		b	全てのデータ
					0m		20.55	18.65	20.65	23.35	19	19.75	22.25	18.3052	20.3	20.15	20.9	22.1		c	最高水温と最低水温の平均
					3m		21.6	21.55	21.15	23.4	22.65	19.7	22.35	19.2468	20.4	21.9	21.45	22		d	0,3,6,7mの平均
					6m		21.6	21.7	21.15	24.3	22.9	19.45	22.35	19.4561	22.2	22.25	22.2	22.25		e	9-10月の平均
					7.3m		21.7	21.65	21.4	24.2	22.85	19.9	22.4	19.5084	22.4	22.4	22.4	22.75		f	9月の平均
																				g	10月の平均
																				塩分			2010	2011	2012	2013	2014	2015	2016	2017	2018	2019	2020	2021
																					0m		27.675	24.5046	25.5875	23.5375	23.6625	29.6	28.0375	22.0875	25.6875	26.35	22.7125	25.15
																					3m		29.75	25.0329	29.4125	28.5625	29.65	30.375	29.7875	29.725	29.025	29.5625	28.8625	29.15
																					6m		30.375	24.5582	30.15	29.8	30.3125	30.65	30.275	30.3375	30.0875	29.9625	29.65	29.8625
																					7.3m		30.525	23.8611	30.3	30.15	30.4	30.9	30.3875	30.6	30.2125	30.2	29.9138	30.0875
[truncated: 55 more columns]
