# Supplementary material for: Current environmental status of the oyster farms on Lake Kamo in Japan; viral control of the harmful bloom of Heterocapsa circularisquama
Source: PeerJ. 2023 May 11;11:e14813. doi: 10.7717/peerj.14813 (PMC10183167; doi:10.7717/peerj.14813)
Supplement: Supplemental Information 3 — The temporal changes recorded from July to October in 2013–2020 for DIN, SIP and DSi [file peerj-11-14813-s003.xlsx]

## Sheet: Nutrient_Kamoko
Nutrient data St.2 2013-
		2012								2013								2014								2015								2016								2017					2018
DIN		120711	120725	120808	120822	120905	120919	121003	121017	7.10	7.23	8.6	8.20	9.3	9.18	10.1	10.15	2014-07-10	2014-07-22	2014-08-05	2014-08-19	2014-09-04	2014-09-18	2014-10-02	2014-10-20	2015-07-08	2015-07-21	2015-08-04	2015-08-18	2015-09-04	2015-09-15	2015-10-06	2015-10-20	2016-07-12	2016-07-25	2016-08-09	2016-08-23	2016-09-07	2016-09-20	2018-10-04	2016-10-18	2017-07-11	2017-07-25	2017-08-10	2017-08-22	2017-09-08	2018-07-10	2018-07-24	2018-08-07
No.2	0m									0.570333	0.531333	1.48433	1.29667	1.27967	9.58133	0.848333	0.794667	0.847667	2.21533	0.322	0.248	0.196	0.775	1.02633	0.548333	0.847667	2.21533	0.322	0.248	0.196	0.775	1.02633	0.548333	7.12	7.25	8.9	8.23	9.7	9.20	10.4	10.8	0.996667	15.317	1.081	1.97067	1.168	3.87633	2.06767	0.781667
Haraguro	SD									0.102909	0.086031	0.121689	0.122451	0.0542433	0.0436616	0.0340196	0.119132	0.465807	0.994415	0.293583	0.154648	0.056	0.777554	1.05131	0.224126	0.465807	0.994415	0.293583	0.154648	0.056	0.777554	1.05131	0.224126	68.429	44.995	54.072	13.8397	61.0897	111.786	66.348	41.2567	0.255586	0.562826	0.232129	1.00183	0.30889	1.06186	0.527549	0.305968
	B-1m									10.7403	32.0213	7.57933	1.42567	10.3173	17.5337	17.891	8.43333	0.466667	3.80167	0.410333	7.426	2.57867	3.62233	2.05333	2.50433	0.466667	3.80167	0.410333	7.426	2.57867	3.62233	2.05333	2.50433	49.9237	53.5267	11.3027	96.0247	40.9087	116.605	22.6647	16.1847	1.555	14.1717	88.105	47.2023	73.7873	1.97533	1.36767	0.509667
	SD									0.0808723	0.150467	0.128784	0.0416213	0.313951	0.227276	0.171476	0.1306	0.104333	0.225824	0.15415	0.367788	0.432631	0.602316	1.26213	0.52944	0.104333	0.225824	0.15415	0.367788	0.432631	0.602316	1.26213	0.52944	5.55949	56.6332	14.2453	74.4803	37.6239	90.1377	4.09897	15.514	0.266276	0.50792	2.43369	1.56145	3.71281	0.303991	1.04766	0.101869
DIP		130710	130723	130806	130820	130903	130918	131001	131015	7.10	7.23	8.6	8.20	9.3	9.18	10.1	10.15	7.10	7.22	8.5	8.19	9.4	9.18	10.2	10.20	7.8	7.21	8.4	8.18	9.4	9.15	10.6	10.20	7.12	7.25	8.9	8.23	9.7	9.20	10.4	10.18	7.11	7.25	8.10	8.22	9.8	7.10	7.24	8.7
No.2	0m									0.0423333	0.041	0.0533333	0.800333	0.816333	0.802333	1.22733	1.287	0.102667	0.195667	0.277	1.26033	0.907333	0.950667	0.823667	0.455667	0.102667	0.195667	0.277	1.26033	0.907333	0.950667	0.823667	0.455667	0.0903333	0.194	0.514	1.64433	1.85567	2.39667	0.282	1.113	0.176	0.507333	0.174667	0.604333	0.632333	0.0193333	0.122333	0.241
Haraguro	SD									0.0150111	0.0175214	0.00945163	0.029023	0.0388373	0.0355012	0.00950438	0.0811911	0.0064291	0.120018	0.0160935	0.0878882	0.0170392	0.0421228	0.0447363	0.0916642	0.0064291	0.120018	0.0160935	0.0878882	0.0170392	0.0421228	0.0447363	0.0916642	0.0137961	0.0345109	0.047655	0.037314	0.0295353	0.0760088	0.0514684	0.0528488	0.0306105	0.048439	0.029023	0.168506	0.140215	0.00152753	0.0126623	0.0043589
	B-1m									3.815	9.568	5.566	6.36867	6.54767	6.26167	3.60633	1.728	0.861	2.268	3.12233	3.763	1.18233	1.41933	0.813333	0.556333	0.861	2.268	3.12233	3.763	1.18233	1.41933	0.813333	0.556333	4.91933	3.76933	6.64967	10.6287	3.10967	2.12367	3.24033	4.978	0.378667	2.04033	12.196	10.7623	14.8973	0.665	0.419333	1.20633
	SD									0.0255343	0.0342199	0.0121655	0.0368963	0.0495715	0.0205508	0.0187705	0.0138924	0.0385876	0.0608523	0.0433167	0.158547	0.025482	0.0315647	0.0413562	0.0323934	0.0385876	0.0608523	0.0433167	0.158547	0.025482	0.0315647	0.0413562	0.0323934	0.424858	0.10961	0.0727484	0.465532	0.334665	0.255034	0.0559851	6.34806	0.019218	0.1035	1.48006	1.219	2.61946	0.0163707	0.0351615	0.0181475
DISi		130710	130723	130806	130820	130903	130918	131001	131015	7.10	7.23	8.6	8.20	9.3	9.18	10.1	10.15	2014-07-10	2014-07-22	2014-08-05	2014-08-19	2014-09-04	2014-09-18	2014-10-02	2014-10-20	2015-07-08	2015-07-21	2015-08-04	2015-08-18	2015-09-04	2015-09-15	2015-10-06	2015-10-20	2016-07-12	2016-07-25	2016-08-09	2016-08-23	2016-09-07	2016-09-20	2018-10-04	2018-10-18	2017-07-11	2017-07-25	2017-08-10	2017-08-22	2017-09-08	7.10	7.24	8.7
No.2	0m									28.0973	20.1007	59.475	23.029	23.153	64.3623	26.6543	33.595	45.8257	37.3527	23.8153	33.0743	18.5697	12.7353	21.6	25.786	45.8257	37.3527	23.8153	33.0743	18.5697	12.7353	21.6	25.786	38.3353	31.2697	28.5007	19.0733	4.915	19.241	7.998	21.0753	31.2793	68.454	21.6127	25.14	6.87433	38.275	30.087	27.5093
Haraguro	SD									0.306872	0.646345	1.73193	0.0451331	0.168009	6.81243	0.172306	0.342203	3.43382	1.43041	1.16308	0.564388	0.340083	1.34472	2.79126	5.37557	3.43382	1.43041	1.16308	0.564388	0.340083	1.34472	2.79126	5.37557	4.46818	4.35122	0.318054	0.218086	0.210029	0.645693	0.429368	0.519442	0.723854	16.1393	0.963528	0.438989	0.699582	7.10676	0.216002	0.713173
	B-1m									86.768	117.987	84.6327	88.4877	81.9313	78.8563	58.0387	35.7143	54.1407	47.5533	48.469	51.4177	18.3673	24.8697	20.14	21.7887	54.1407	47.5533	48.469	51.4177	18.3673	24.8697	20.14	21.7887	63.1837	57.8873	64.0813	78.37	34.7357	21.1863	57.709	20.465	33.5947	63.5577	107.144	107.123	129.33	42.694	40.5177	42.0563
	SD									1.03922	0.756738	0.710252	3.45989	1.47231	4.31885	0.903296	0.264615	1.18001	2.84115	2.43591	3.76953	0.832967	1.2636	1.64177	0.955176	1.18001	2.84115	2.43591	3.76953	0.832967	1.2636	1.64177	0.955176	4.60201	2.16015	1.19269	3.98233	3.34517	0.457735	1.19685	0.858551	0.526461	1.3921	1.97592	1.1605	3.02592	1.43158	1.33454	1.7375
DIN		2012	2013	2014	2015	2016	2017	2018	2019	2020	2021
	0m	#DIV/0!	2.04833	0.772333	0.772333	7.12	4.10667	1.48296	0.700096	2.11032	12.9997
	SD	#DIV/0!	0.0855172	0.50218	0.50218	57.727	0.472252	0.50026	0.112839	0.571259	7.71523
	7.3m	#DIV/0!	13.2427	2.85792	2.85792	50.8926	44.9643	4.2415	13.0656	14.3806	31.2314
	7.3m	#DIV/0!	0.155631	0.459827	0.459827	37.2866	1.69643	0.647083	0.202516	0.334396	12.2683
原黒
平均値（全て）
DIP		2012	2013	2014	2015	2016	2017	2018	2019	2020	2021
	0m	#DIV/0!	0.63375	0.621625	0.621625	1.01125	0.418933	0.41225	0.234654	0.410146	0.504583
	3m	#DIV/0!	0.0295051	0.0532489	0.0532489	0.0428922	0.0833588	0.00918158	0.0193022	0.0563656	0.0300797
	6m	#DIV/0!	5.43267	1.74821	1.74821	4.92733	8.05493	2.18817	4.23667	6.07237	3.6241
	7.3m	#DIV/0!	0.0264501	0.0540124	0.0540124	1.00831	1.08825	0.0350804	0.153229	0.121293	0.172143
最高と最低の平均値
		2012	2013	2014	2015	2016	2017	2018	2019	2020	2021
	0m	0	1.04367	0.325667	0.366333	0.8135	#REF!	0.514833	0.0780333	0.61425	0.243667
	3m	0	0.0551071	0.0543517	0.0897762	0.0502519	#REF!	0.00370697	0.00893114	0.108549	0.0168292
	6m	0	4.13783	0.869333	2.15967	7.80333	#REF!	1.9715	1.86658	3.743	2.76042
	7.3m	0	0.0172216	0.0289377	0.09547	3.34136	#REF!	0.0493751	0.115063	0.0949492	0.171243
a	７−１０月の平均
b	全てのデータ
c	最高水温と最低水温の平均
d	0,3,6,7mの平均
Si		2012	2013	2014	2015	2016	2017	2018	2019	2020	2021
	0m	#DIV/0!	34.8083	27.3449	27.3449	21.301	30.6721	31.1162	20.2412	28.1002	34.0323
	3m	#DIV/0!	1.27815	2.05542	2.05542	1.39501	3.79305	1.80664	0.456818	2.16655	1.33477
	6m	#DIV/0!	79.052	35.8433	35.8433	49.7023	88.1499	40.481	34.4781	47.503	41.0197
	7.3m	#DIV/0!	1.61565	1.86501	1.86501	2.22443	1.61618	2.12853	1.16863	2.6873	2.56716
[truncated: 29 more columns]
